# Supplementary material
Source: HighWire-hosted journal article supplement (https://jnm.snmjournals.org/highwire/filestream/95409/field_highwire_adjunct_files/0/221283_Supplemental_Data.pdf)
Supplement: 221283_Supplemental_Data.pdf [file 221283_Supplemental_Data.pdf]

**SUPPLEMENTAL TABLE 1.** Biodistribution of DOTA-MGS5 radiolabeled with different radiometals in the A431-CCK2R/A431-mock mouse tumor model. Values are expressed as % IA/g (mean±SD, n=4)

| Time p.i.       | <sup>111</sup> In-DOTA-MGS5 | <sup>111</sup> In-DOTA-MGS5 | <sup>111</sup> In-DOTA-MGS5* | <sup>68</sup> Ga-DOTA-MGS5 | <sup>177</sup> Lu-DOTA-MGS5 |
|-----------------|-----------------------------|-----------------------------|------------------------------|----------------------------|-----------------------------|
|                 | 1 h                         | 4 h                         | after imaging                | 1 h                        | 4 h                         |
| blood           | 1.19±0.29                   | 0.05±0.03                   | 0.04±0.01                    | 1.47±0.82                  | 0.14±0.11                   |
| lung            | 0.93±0.30                   | 0.09±0.05                   | 0.07±0.03                    | 1.35±0.64                  | 0.19±0.14                   |
| heart           | 0.48±0.10                   | 0.05±0.02                   | 0.07±0.02                    | 0.82±0.51                  | 0.10±0.07                   |
| muscle          | 0.46±0.23                   | 0.26±0.28                   | 0.04±0.01                    | 0.22±0.17                  | 0.11±0.02                   |
| bone            | 0.35±0.11                   | 0.11±0.09                   | 0.06±0.02                    | 0.37±0.17                  | 0.24±0.28                   |
| spleen          | 0.43±0.07                   | 0.16±0.04                   | 0.13±0.04                    | 0.68±0.38                  | 0.22±0.16                   |
| intestine       | 0.95±0.06                   | 1.15±0.31                   | 0.34±0.04                    | 0.79±0.35                  | 1.02±0.28                   |
| liver           | 0.87±0.10                   | 0.46±0.03                   | 0.66±0.60                    | 1.02±0.52                  | 0.74±0.59                   |
| kidney          | 5.28±0.87                   | 3.88±0.45                   | 1.61 ±0.21                   | 5.71±1.38                  | 3.84±0.64                   |
| stomach         | 11.16±1.40                  | 8.24±2.39                   | 3.17±0.77                    | 5.12±1.13                  | 6.86±4.68                   |
| pancreas        | 2.34±0.85                   | 1.60±0.50                   | 0.11±0.02                    | 1.83±0.42                  | 2.54±0.25                   |
| tumor xenograft |                             |                             |                              |                            |                             |
| A431-CCK2R      | 19.53±5.42                  | 23.49±1.25                  | 14.04±4.73                   | 23.25±4.70                 | 24.45±3.11                  |
| A431-mock       | 0.80±0.12                   | 0.30±0.12                   | 0.32±0.18                    | 0.78±0.26                  | 0.18±0.01*                  |

\* n=3

**SUPPLEMENTAL TABLE 2.** Tumor-to-organ activity ratios for A431-CCK2R xenografts of DOTA-MGS5 radiolabeled with different radiometals (mean±SD, n=4)

| Time p.i.      | <sup>111</sup> In-DOTA-MGS5 | <sup>111</sup> In-DOTA-MGS5 | <sup>111</sup> In-DOTA-MGS5* | <sup>68</sup> Ga-DOTA-MGS5 | <sup>177</sup> Lu-DOTA-MGS5 |
|----------------|-----------------------------|-----------------------------|------------------------------|----------------------------|-----------------------------|
|                | 1 h                         | 4 h                         | after imaging                | 1 h                        | 4 h                         |
| Tumor/blood    | 17.4±7.4                    | 572±243                     | 340±100                      | 18.9±7.5                   | 256±123                     |
| Tumor/kidney   | 3.87±1.57                   | 6.11±0.64                   | 4.35±0.56                    | 4.10±0.26                  | 6.53±1.60                   |
| Tumour/stomach | 1.76±0.49                   | 3.08±1.07                   | 9.04±3.86                    | 4.60±0.80                  | 4.74±2.59                   |

\* n=3

Formatted: Right: 0"
